# Supplementary material
Source: publisher figshare collection journal article supplement (https://karger.figshare.com/articles/dataset/_/11708280)
Supplement: Supplementary file 1 [file 1]

**SUPPLEMENTARY TABLE 1 - EQUATIONS USED TO ESTIMATE GFR**

| Formula                                     | Equation                                                                                                                                                                                                                                                                                                                                                             |
|---------------------------------------------|----------------------------------------------------------------------------------------------------------------------------------------------------------------------------------------------------------------------------------------------------------------------------------------------------------------------------------------------------------------------|
| <i>Creatinine-based equations</i>           |                                                                                                                                                                                                                                                                                                                                                                      |
| CKD-EPI-cr                                  | $141 * \min(\text{Scr}/\kappa, 1)^\alpha * \max(\text{Scr}/\kappa, 1)^{-1.209} * 0.993^{\text{Age}} * 1.018 \text{ [if female]} * 1.159 \text{ [if black]}$ $\kappa = 0.7 \text{ for females and } 0.9 \text{ for males}$ $\alpha = -0.329 \text{ for females and } -0.411 \text{ for males}$                                                                        |
| MDRD                                        | $175 * (\text{Scr})^{-1.154} * (\text{age})^{-0.203} * 0.742 \text{ [if female]} * 1.212 \text{ [if Black]}$                                                                                                                                                                                                                                                         |
| FAS                                         | $107.3 / (\text{Scr} * Q) * [0.988^{(\text{Age} - 40)} \text{ when Age} > 40]$ $Q = 0.7 \text{ if female and } 0.9 \text{ if male}$                                                                                                                                                                                                                                  |
| MCQ                                         | $e^x$ $x = 1.911 + (5.249 / \text{Scr}) - (2.114 / \text{Scr}^2) - 0.00686 * \text{Age} \text{ [-0.205 if female]}$ <p>(if Scr &lt; 0.8 use Scr = 0.8)</p>                                                                                                                                                                                                           |
| <i>Cystatin C-based equations</i>           |                                                                                                                                                                                                                                                                                                                                                                      |
| Le Bricon                                   | $(78 / \text{Scys}) + 4$                                                                                                                                                                                                                                                                                                                                             |
| CKD-EPI-cy                                  | $133 * \min(\text{Scys}/0.8, 1)^{-0.499} * \max(\text{Scys}/0.8, 1)^{-1.328} * 0.996^{\text{Age}} * 0.932 \text{ [if female]}$                                                                                                                                                                                                                                       |
| Rule                                        | $66.8 * \text{Scys}^{-1.3}$                                                                                                                                                                                                                                                                                                                                          |
| <i>Creatinine-Cystatin C-based equation</i> |                                                                                                                                                                                                                                                                                                                                                                      |
| CKD-EPI-cr-cy                               | $135 * \min(\text{Scr}/\kappa, 1)^\alpha * \max(\text{Scr}/\kappa, 1)^{-0.601} * \min(\text{Scys}/0.8, 1)^{-0.375} * \max(\text{Scys}/0.8, 1)^{-0.711} * 0.995^{\text{Age}} * 0.969 \text{ [if female]} * 1.08 \text{ [if black]}$ $\kappa = 0.7 \text{ for females and } 0.9 \text{ for males}$ $\alpha = -0.329 \text{ for females and } -0.411 \text{ for males}$ |
