# Supplementary material
Source: publisher figshare collection journal article supplement (https://karger.figshare.com/articles/dataset/_/11708280)
Supplement: Supplementary file 2 [file 1]

**SUPPLEMENTARY TABLE 2 - ACCURACY P30 FOR FORMULAS IN COHORT 1 AND 2 STRATIFIED BY AGE TERTILES**

| Age tertiles | <b>P<sub>30</sub> (%) vs mGFR-iox</b>  |      |     |     |            |      |          |               |
|--------------|----------------------------------------|------|-----|-----|------------|------|----------|---------------|
|              | CKD-EPI-cr                             | MDRD | MCQ | FAS | CKD-EPI-cy | RULE | Lebricon | CKD-EPI-cr-cy |
| 18 – 50      | 75                                     | 81   | 38  | 65  | 78         | 76   | 72       | 85            |
| 50 – 65      | 73                                     | 74   | 49  | 70  | 80         | 78   | 66       | 84            |
| 65 – 88      | 75                                     | 80   | 61  | 81  | 81         | 76   | 35       | 89            |
|              |                                        |      |     |     |            |      |          |               |
| Age tertiles | <b>P<sub>30</sub> (%) vs mGFR-scnt</b> |      |     |     |            |      |          |               |
|              | CKD-EPI-cr                             | MDRD | MCQ | FAS | //         |      |          |               |
| 18 – 51      | 75                                     | 67   | 58  | 73  |            |      |          |               |
| 51 – 68      | 69                                     | 64   | 57  | 67  |            |      |          |               |
| 68 – 94      | 68                                     | 66   | 51  | 69  |            |      |          |               |
